# Supplementary material
Source: publisher site journal article supplement (https://www.dovepress.com/article/304950)
Supplement: Supplementary file 1 [file get_supplementary_file.php]

**Appendix 1. Search strategy**

| Database | Search | Number of hits |
| --- | --- | --- |
| Pubmed  1966 –  Date: 11.9.18 | **#1:**  Search **("Pain/psychology"[Majr]) OR ((pain[Title/Abstract]) AND ((affecti*[Title/Abstract] OR emotion*[Title/Abstract] OR psychol*[Title/Abstract] OR evaluat*[Title/Abstract] OR anxiety[Title/Abstract] OR mood[Title/Abstract] OR fear[Title/Abstract] OR distress[Title/Abstract] OR fatigue[Title/Abstract] OR exhaust*[Title/Abstract])))**  **#2:**  Search **(chronic[Title/Abstract]) OR "Chronic Disease"[Mesh]**  **#3:**  Search **questionnaire*[Title/Abstract] OR PROM*[Title/Abstract] OR patient reported outcome*[Title/Abstract] OR "self reported"[Title/Abstract] OR "Glasgow pain questionnaire"[Title/Abstract] OR "Pain-O-meter"[Title/Abstract] OR "Pain anxiety symptoms scale"[Title/Abstract] OR "profile of chronic pain Screen"[Title/Abstract] OR "PCP S"[Title/Abstract] OR "multidimensional pain inventory"[Title/Abstract] OR "MPI"[Title/Abstract] OR "WHYMPI"[Title/Abstract] OR "Global pain scale"[Title/Abstract] OR "comprehensive pain evaluation scale"[Title/Abstract] OR MPQ[Title/Abstract]**  **#4:**  Search **(((instrumentation[sh] OR methods[sh] OR "Validation Studies"[pt] OR "Comparative Study"[pt] OR "psychometrics"[MeSH] OR psychometr*[tiab] OR clinimetr*[tw] OR clinometr*[tw] OR "outcome assessment (health care)"[MeSH] OR "outcome assessment"[tiab] OR "outcome measure*"[tw] OR "observer variation"[MeSH] OR "observer variation"[tiab] OR "Health Status Indicators"[Mesh] OR "reproducibility of results"[MeSH] OR reproducib*[tiab] OR "discriminant analysis"[MeSH] OR reliab*[tiab] OR unreliab*[tiab] OR valid*[tiab] OR "coefficient of variation"[tiab] OR coefficient[tiab] OR homogeneity[tiab] OR homogeneous[tiab] OR "internal consistency"[tiab] OR (cronbach*[tiab] AND (alpha[tiab] OR alphas[tiab])) OR (item[tiab] AND (correlation*[tiab] OR selection*[tiab] OR reduction*[tiab])) OR agreement[tw] OR precision[tw] OR imprecision[tw] OR "precise values"[tw] OR test-retest[tiab] OR (test[tiab] AND retest[tiab]) OR (reliab*[tiab] AND (test[tiab] OR retest[tiab])) OR stability[tiab] OR interrater[tiab] OR inter-rater[tiab] OR intrarater[tiab] OR intra-rater[tiab] OR intertester[tiab] OR inter-tester[tiab] OR intratester[tiab] OR intra-tester[tiab] OR interobserver[tiab] OR inter-observer[tiab] OR intraobserver[tiab] OR intra-observer[tiab] OR intertechnician[tiab] OR inter-technician[tiab] OR intratechnician[tiab] OR intra-technician[tiab] OR interexaminer[tiab] OR inter-examiner[tiab] OR intraexaminer[tiab] OR intra-examiner[tiab] OR interassay[tiab] OR inter-assay[tiab] OR intraassay[tiab] OR intra-assay[tiab] OR interindividual[tiab] OR inter-individual[tiab] OR intraindividual[tiab] OR intra-individual[tiab] OR interparticipant[tiab] OR inter-participant[tiab] OR intraparticipant[tiab] OR intra-participant[tiab] OR kappa[tiab] OR kappa's[tiab] OR kappas[tiab] OR repeatab*[tw] OR ((replicab*[tw] OR repeated[tw]) AND (measure[tw] OR measures[tw] OR findings[tw] OR result[tw] OR results[tw] OR test[tw] OR tests[tw])) OR generaliza*[tiab] OR generalisa*[tiab] OR concordance[tiab] OR (intraclass[tiab] AND correlation*[tiab]) OR discriminative[tiab] OR "known group"[tiab] OR "factor analysis"[tiab] OR "factor analyses"[tiab] OR "factor structure"[tiab] OR "factor structures"[tiab] OR dimension*[tiab] OR subscale*[tiab] OR (multitrait[tiab] AND scaling[tiab] AND (analysis[tiab] OR analyses[tiab])) OR "item discriminant"[tiab] OR "interscale correlation*"[tiab] OR error[tiab] OR errors[tiab] OR "individual variability"[tiab] OR "interval variability"[tiab] OR "rate variability"[tiab] OR (variability[tiab] AND (analysis[tiab] OR values[tiab])) OR (uncertainty[tiab] AND (measurement[tiab] OR measuring[tiab])) OR "standard error of measurement"[tiab] OR sensitiv*[tiab] OR responsive*[tiab] OR (limit[tiab] AND detection[tiab]) OR "minimal detectable concentration"[tiab] OR interpretab*[tiab] OR ((minimal[tiab] OR minimally[tiab] OR clinical[tiab] OR clinically[tiab]) AND (important[tiab] OR significant[tiab] OR detectable[tiab]) AND (change[tiab] OR difference[tiab])) OR (small*[tiab] AND (real[tiab] OR detectable[tiab]) AND (change[tiab] OR difference[tiab])) OR "meaningful change"[tiab] OR "ceiling effect"[tiab] OR "floor effect"[tiab] OR "Item response model"[tiab] OR IRT[tiab] OR Rasch[tiab] OR "Differential item functioning"[tiab] OR DIF[tiab] OR "computer adaptive testing"[tiab] OR "item bank"[tiab] OR "cross-cultural equivalence"[tiab]))) NOT ((("addresses"[Publication Type] OR "biography"[Publication Type] OR "case reports"[Publication Type] OR "comment"[Publication Type] OR "directory"[Publication Type] OR "editorial"[Publication Type] OR "festschrift"[Publication Type] OR "interview"[Publication Type] OR "lectures"[Publication Type] OR "legal cases"[Publication Type] OR "legislation"[Publication Type] OR "letter"[Publication Type] OR "news"[Publication Type] OR "newspaper article"[Publication Type] OR "patient education handout"[Publication Type] OR "popular works"[Publication Type] OR "congresses"[Publication Type] OR "consensus development conference"[Publication Type] OR "consensus development conference, nih"[Publication Type] OR "practice guideline"[Publication Type]) NOT ("animals"[MeSH Terms] NOT "humans"[MeSH Terms])))**  **#5:**  #1 AND #2 AND #3 AND #4 | 185.221  1.116.812  676.472  7.957.252  6.321 |

The search strategy shown above was adapted to Embase, PsycINFO and Cochrane Library with the following results:

| Database | Number of hits |
| --- | --- |
| Embase  1974 –  Date: 17.9.18 | 4.004 |
| PsycINFO  1806 –  Date 29.9.18 | 1.257 |
| Cochrane Library  Date: 26.9.18 | 2.566 |

|  | **Inclusion** | **Exclusion** |
| --- | --- | --- |
| Population | Adults aged > 18 years suffering from chronic pain of any aetiology.  Mixed population are included if data is stratified corresponding to these eligibility criteria or when the majority of the study population corresponds to the eligibility criteria, i.e. small discrepancies are accepted. | Children aged < 18 years. |
| Setting | Settings corresponding to clinical settings in real life.  Research of intervention settings. | Experimental or laboratory pain research.  Pain sensitivity research. |
| Intervention | Any type of questionnaire (PROM) that contains items encompassing the affective/emotional aspect of pain, e.g. mood, discomfort, fatigue, anxiety or abbreviations hereof.  PROMs that exclusively measure affective pain or that also measure the affective component of pain as a defined construct. | Questionnaires designed for a different construct than pain, such as depression- or anxiety scales.  (Sub)scales measuring affective diseases, e.g. depression, or scales that do not measurethe affective component of pain in its’ entirety.  Single item scores such as VAS1 or NPRS2.  Short-form versions or translations of existing PROMs. |
| Outcomes | PROM development or content validity via internal consistency, differential item function, structural validity or unidimensionality of the scale. | Studies that exclusively regard the results of the PROM when used as measurement tool for an intervention. |
| Study design | PROM development or content validity studies of any design, i.e. all types of original research: RCT’s, CCTs, cohort studies, case-control studies, cross-sectional studies, case series. | Original articles not written in English.  Systematic reviews.3 Any article not related to original data/research: journalism, editorials, dissertations, conference abstracts, narrative reviews and opinions as letters or comments. |

**Appendix 2 – eligibility criteria**

**1**) Visual Analog Scale

2) Numeric Pain Rating Scale

3) Referencelists in reviews deemed relevant to the research question will be scrutinized for studies not found via the search strategy.

**Appendix 3 Study characteristics table**

|  |  |  | **Population** |  |  | **Disease** |  | **Instrument** |
| --- | --- | --- | --- | --- | --- | --- | --- | --- |
| no. | **PROM** | **Ref** | **N** | **Age (mean)** | **Gender % female** | **Disease** | **Disease duration mean (SD) yr** | **Psychometric data analysis** |
| 1 | MPQ | Melzack, 1970 | Study 1:  20 & 20 Study 2:  140, 20 & 20 | Study 1: 29,9 & 28,8 years Study 2:  20, 26,5 & 30,7 years | Study 1: 30 & 40 % female Study 2: 10, 40 & 65 % female | Study 1: none, university students study 2: none, university students, doctors & pain patients, unspecified | Not specified | None |
| 2 | MPQ | Melzack, 1975 | 297 | Not specified | Not specified | Mixed pain categories | Not specified | None |
| 3 | MPQ | Crockett, 1977 | 129 & 85 | Not specified &  females: 41,8 years males: 40,4 years | 39 % female &  21 % female | Experimental pain  &  Back pain, unspecified | females: 7,56 years males: 7,11 years | EFA |
| 4 | MPQ | Leavitt, 1978 | 131 | 41,7 years | 44 % female | Back pain, unspecified | Not specified | EFA |
| 5 | MPQ | Reading, 1979 | 166 | 24 | 100 % female | Dysmenorrhoea | Not specified | EFA |
| 6 | MPQ | Prieto, 1980 | 198 | females: 48,5 years males: 45,2 years | 70 % female | Back pain, unspecified | females: 9,2 years males: 7,2 years | EFA |
| 7 | MPQ | Kremer, 1981 | 126 | Not specified | 48 % female | Chronic pain, unspecified | > 0,5 years | EFA |
| 8 | MPQ | Reading, 1982 | 95 | Not specified | 100 % female | post-episiotomy pain & labor pain | < 1 year | EFA |
| 9 | MPQ | Byrne, 1982 | 98 | males: 41,7 years females: 48,1 years | 64 % female | Back pain, unspecified | males: 5,5 years females: 7,7 years | EFA |
| 10 | MPQ | Burck-hardt, 1984 | 94 & 94 | Not specified | 83 & 74 % female | 50 % Rheumatoid arthritis, 30 % osteoarthritis, 20 % less common rheumatoid disease | Not specified | EFA |
| 11 | MPQ | Turk, 1985 | 70 & 98 | 50,4 & 45,8 years | 19 & 64 % female | Chronic pain, unspecified & back pain, unspecified | 10,7 & 6,9 years | CFA |
| 12 | MPQ | Hand, 1986 | 60, 61 & 61 | 25,6 , 24,4 & not specified | 100 , 70 & 63 % female | Post-episiotomy pain, wisdom tooth extraction &  rheumatoid arthritic pain | Not specified | EFA |
| 13 | MPQ | Bren-nan, 1987 | 127 | 42 years | 54 % female | Chronic pain, mixed categories | 4,5 yeas | CFA |
| 14 | MPQ | Lowe, 1991 | 185 & 192 | 28,2 years & not specified | 100 % female | Labor pain & post abdominal surgery pain | < 1 year | CFA |
| 15 | MPQ | Hol-royd, 1992 | 1372 | 41,9 years | 48 % female | Low-back pain | 5,45 years | CFA |
| 16 | MPQ | Donald-son, 1994 | 191 | 35 years | 47 % female | Oral mucositis following bone marrow transplantation | Not specified | CFA |
| 17 | MPQ | Hol-royd, 1996 | 419 | 39 years | 69 % female | Headache, mixed types | 15,5 years | CFA |
| 18 | MPQ | Boyle, 2015 | 448 | 43,1 years | 60 % female | Acute and chronic pain patients, unspecified | Not specified | CFA |
| 19 | MPI | Kerns, 1985 | 120 | 50.8 years | 18.5 % female | Veterans with chronic pain | 10.2 years | CFA, Cronbach’s alpha |
| 20 | MPI | Mikail, 1993 | 315 | 43.5 years | 52.7 % female | Chronic pain patients | 6.6 years | EFA |
| 21 | MPI | Bern-stein, 1995 | 194 | Not specified | Not specified | Low back pain patients | Not specified | CFA, Cronbach’s alpha |
| 22 | MPI | De Gagné, 1995 | 306 | males: 39 years females: 42 years | 56.5 % female | Chronic pain patients | 6.3 years | CFA |
| 23 | MPI | Riley, 1999 | 472 & 346 | 44.1 & 43.7 years | 39 & 46 % female | Chronic pain patients | 3.3 & 5.0 years | EFA & CFA |
| 24 | MPI | Dei-singer, 2001 | 452 & 267 | 41.7 & 41.3 | 55.3 & 55.8 % female | Chronic back pain | 3.35 & 4.07 years | EFA & CFA |
| 25 | MPI | Wit-tink, 2004 | 424 | 45.6 years | 62.0 % female | Pain patients | Not specified | Cronbach’s alpha |
| 26 | MPI | Hop-wood, 2007 | 235 | 48.7 years | 73.3 % female | Chronic pain patients | 9 years | EFA |
| 27 | MPI | David-son, 2008 | 126 | 50.4 years | 68.2 % female | Chronic pain patients | Not specified | EFA |
| 28 | MPI | MCKillop, 2011 | 472 | 47.2 years | 97 % female | Fibromyalgia patients | Not specified | EFA |
| 29 | PDS | Jensen, 1991 | 59 | 49,3 years | 68 % female | Mixed chronic pain population | 9,3 years | EFA, Cronbach’salpha |
| 30 | GPS | Gentile, 2011 | 262 | 21 years | 59 % female | Chronic pain | Not specified | CFA, Cronbach’s alpha |
| 31 | GPQ | Thomas, 1996 | 230, 60 & 294 | Not specified | Not specified | Mixed population, not specified & rheumatic patients, occupational health clinic patients and chronic pain patients | Not specified | None |
| 32 | PCP: S | Ruehl-man, 2005 | 2449 | 35.86 , 54.18 & 72.39 | 51 % female | None specified, community residents | - | CFA, Cronbach’salpha |
| 33 | PCP: S | Karoly, 2006 | 37 & 207 | 29 & 50 | 52 % female | Chronic pain patients recruited from a student health center and various family health centers | > 0,5 years | CFA, Cronbach’salpha |
| 34 | PROMIS PQ | DeWalt, 2007 | 24 & 44 | 60.7 & 46 years | 79 & 59 % female | Arthritis, rehabilitation, mixed internal medicine outpatients & 35 Rehabilitation patients | Not specified | None |
| 35 | PROMIS PQ | Revicki, 2014 | 845 & 967 | Not specified & > 21 years | Not specified | General population & chronic pain patients | > 3 months | EFA, CFA |
| 36 | MMPAP | Rucker, 1996 | 651 | Not specified | 59.6 % female | Chronic pain | > 0.5 years | EFA |
| 37 | MAPS | Clark, 2003 | 100 | men: 60.6 years women: 54.6 years | 62 % female | Cancer outpatients | Not specified | EFA |
| 38 | VPAQ | Dargie, 2016 | 288 | 33.8 years | 98.3 % female | Vulvar pain patients | Not specified | EFA |
